# Supplementary material for: Heteroatom-induced domain electrostatic potential difference in ZnIn2S4nanosheets for efficient charge separation and boosted photocatalytic overall water splitting
Source: Royal Society of Chemistry journal article supplement (doi:10.1039/d2qm00314g), 2022-01-01
Supplement: d2qm00314g1.pdf [file d2qm00314g1.pdf]

# **Heteroatom-induced domain electrostatic potential difference in $\text{ZnIn}_2\text{S}_4$ nanosheets for efficient charge separation and boosted photocatalytic overall water splitting**

Bojing Sun<sup>a†</sup>, Dingge Fan<sup>a†</sup>, Xiaoyu Chen<sup>a</sup>, Zhenzi Li<sup>b</sup>, Wei Zhou<sup>\*b</sup>, and Yunchen

Du<sup>\*a</sup>

<sup>a</sup> MIIT Key Laboratory of Critical Materials Technology for New Energy Conversion and Storage, School of Chemistry and Chemical Engineering, Harbin Institute of Technology, Harbin 150001, China

<sup>b</sup> Shandong Provincial Key Laboratory of Molecular Engineering, School of Chemistry and Chemical Engineering, Qilu University of Technology (Shandong Academy of Sciences), Jinan, Shandong, 250353, China.

---

*\* Corresponding authors.*

E-mail address: [yunchendu@hit.edu.cn](mailto:yunchendu@hit.edu.cn). (Y. Du); [zwchem@hotmail.com](mailto:zwchem@hotmail.com). (W. Zhou).

## Characterization

X-ray diffraction (XRD) measurements were performed by using the Bruker D8 Advance diffractometer by using Cu K $\alpha$  radiation ( $\lambda=1.5406$  Å). The transmission electron microscopy (TEM) was obtained on a JEOL-2100 electron microscope (JEOL, Japan) with an acceleration voltage of 200 kV. Nitrogen adsorption-desorption isotherms at 77 K were collected on an AUTOSORB-1 (Quantachrome Instruments) nitrogen adsorption apparatus. All samples were degassed under vacuum at 150 °C for at least 5 h before measurement. UV/vis adsorption spectra were conducted on a UV/vis spectrophotometer (Lambda 950 (PerkinElmer, USA)) in the range of 200-800 nm. X-ray photoelectron spectroscopy (XPS) (thermofisher escalab 250xi) was recorded to study the surface states. The luminescence lifetimes were detected with an Edinburgh FL-FS 920 fluorescence spectrophotometer with an excitation wavelength at 350 nm. The amount of Al doping was measured by Inductively Coupled Plasma (Optima 8300 (PerkinElmer, USA) ICP-OES). The photoluminescence (PL) spectra were measured by a PELS 55 spectrofluorophotometer with the excitation wavelength of 330 nm.

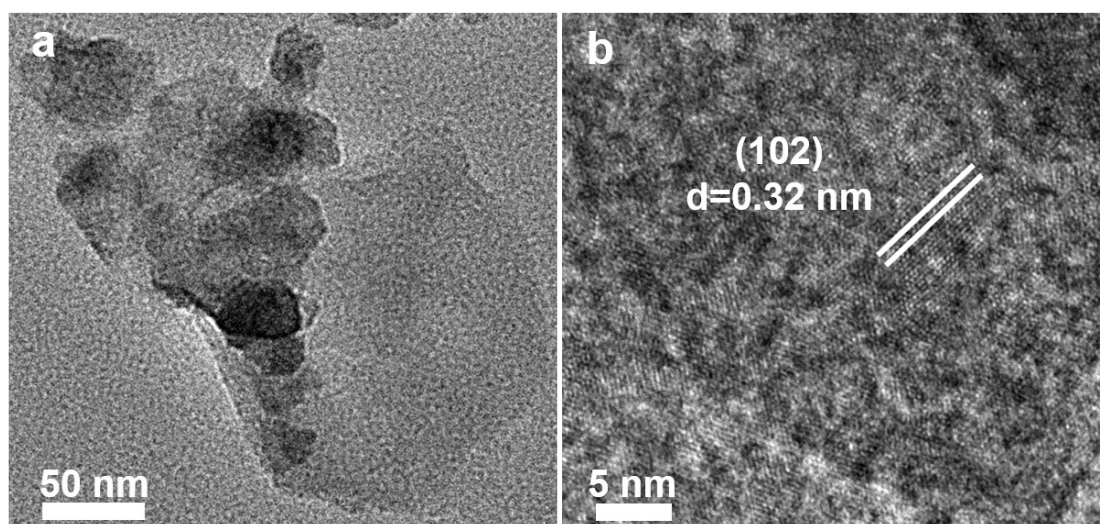

**Fig. S1.** (a) TEM and (b) HRTEM images of ZIS nanosheets.

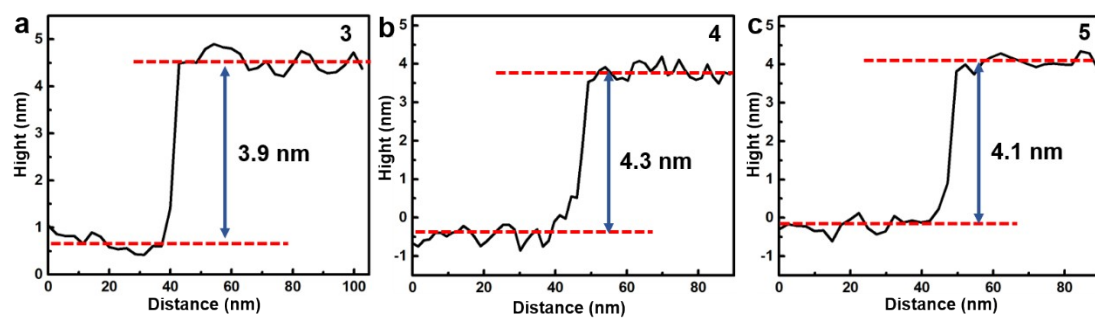

**Fig. S2.** The corresponding height profiles of Al-ZIS nanosheets.

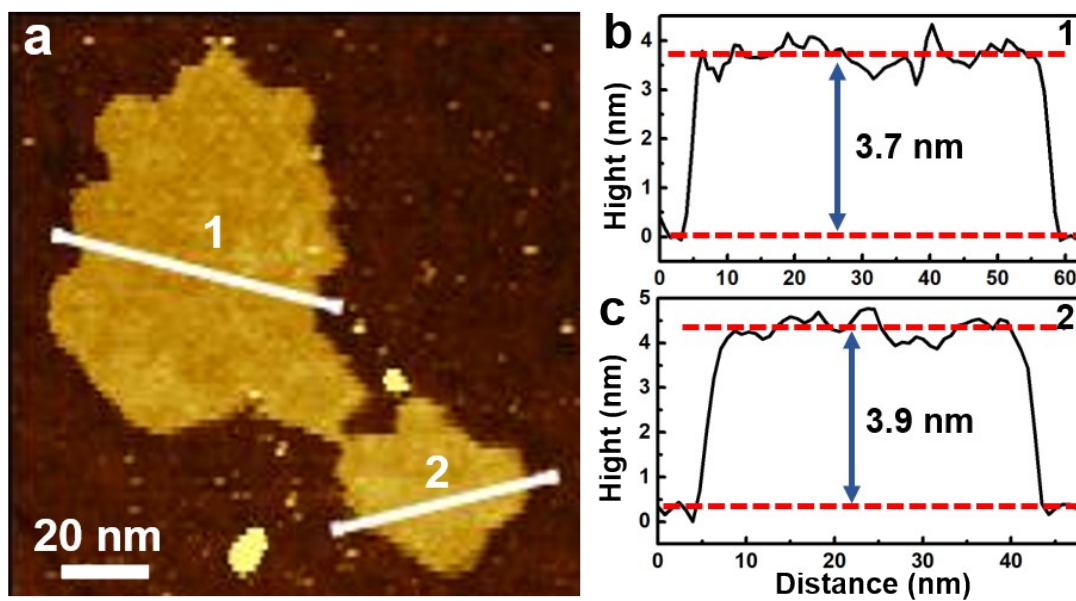

**Fig. S3.** (a) AFM image and (b) the corresponding height profiles of pure ZIS nanosheets.

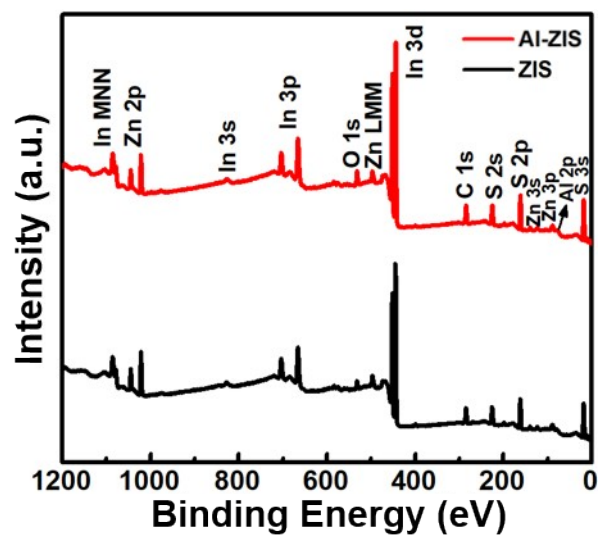

**Fig. S4.** XPS spectra of full survey for ZIS and Al-ZIS nanosheets, respectively.

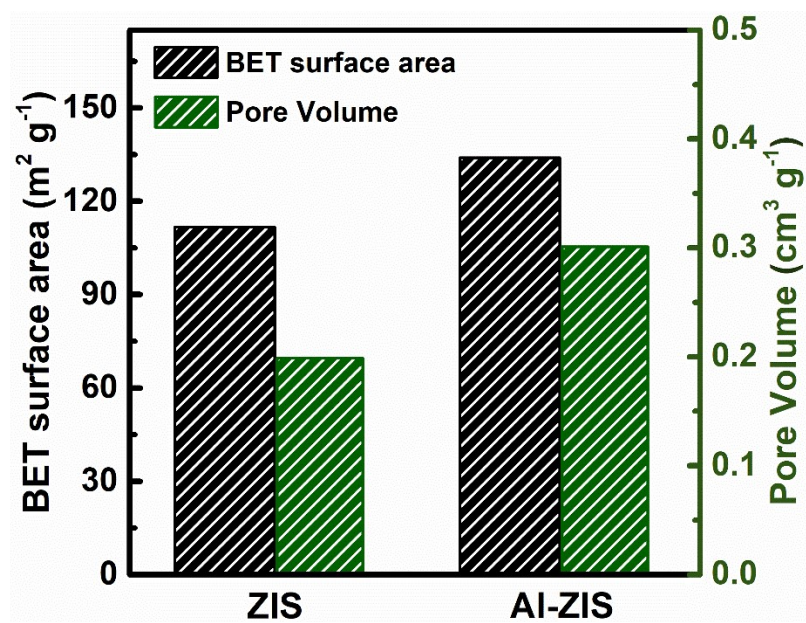

**Fig. S5.** The BET surface areas and pore volumes of ZIS and Al-ZIS nanosheets.

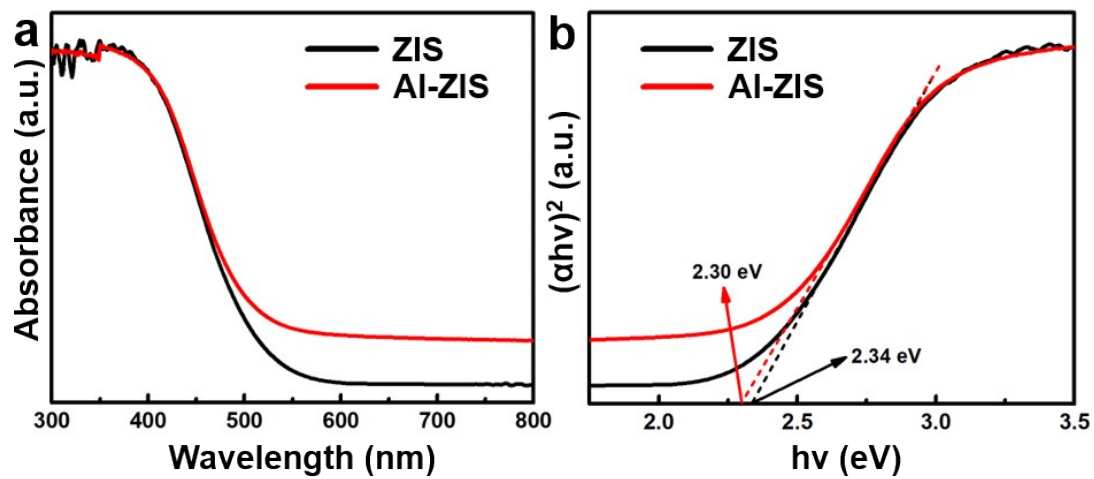

**Fig. S6.** UV-vis absorption spectra and corresponding bandgaps of ZIS and Al-ZIS nanosheets.

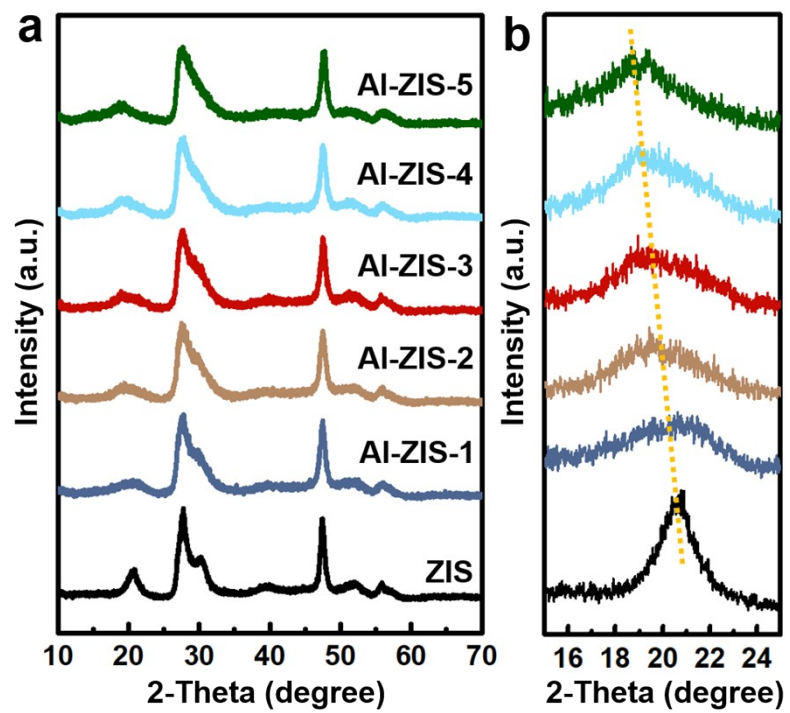

**Fig. S7.** XRD patterns of Al-ZIS nanosheets with different Al doping amounts.

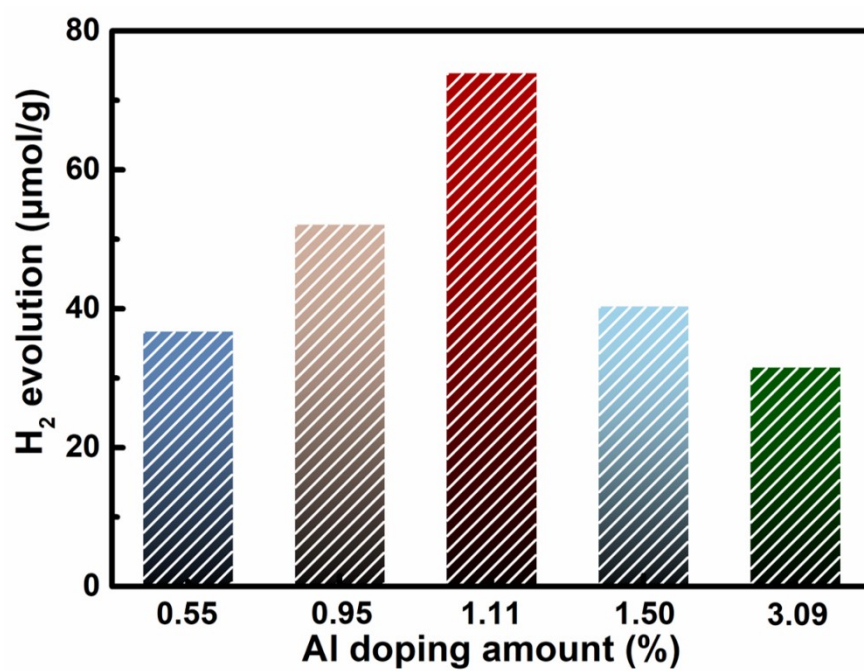

**Fig. S8.** H<sub>2</sub> evolution rates of Al-ZIS nanosheets with different Al doping amounts.

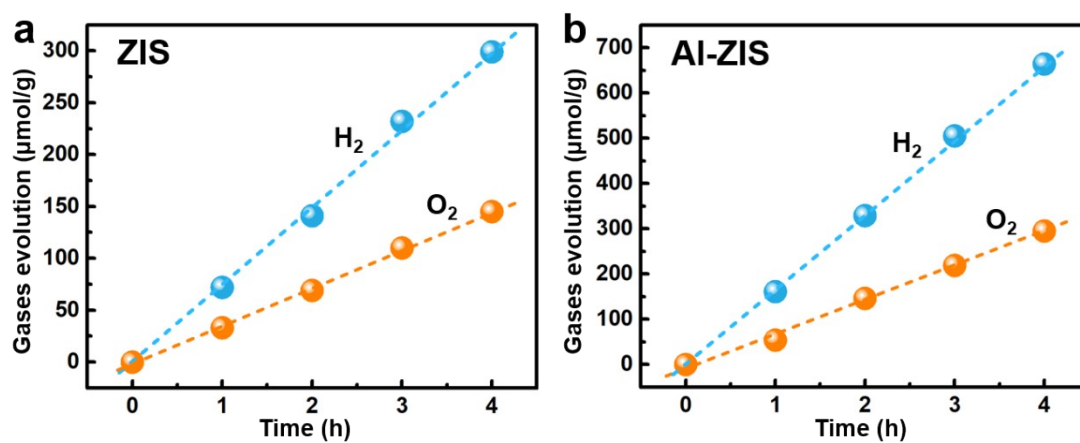

**Fig. S9.** Photocatalytic  $H_2$  and  $O_2$  evolution of ZIS and Al-ZIS nanosheets under AM1.5G.

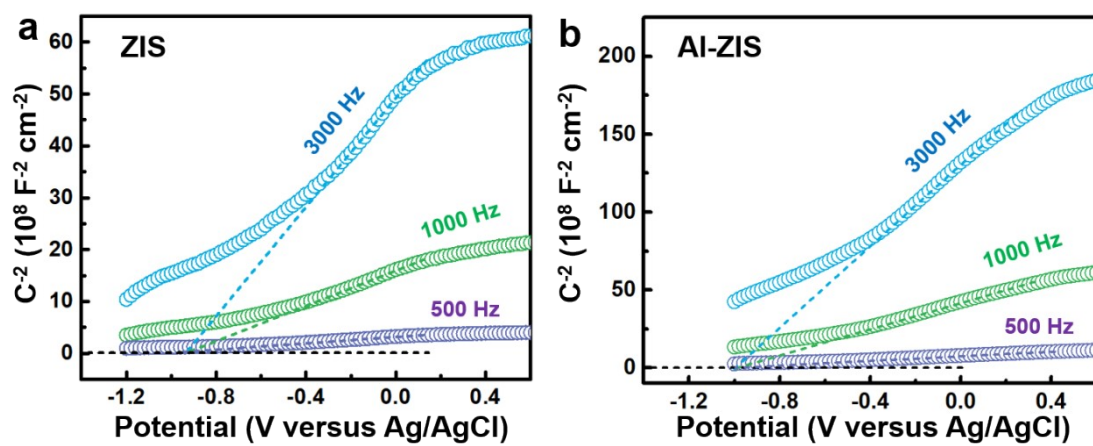

**Fig. S10.** Mott-Schottky plots of ZIS and Al-ZIS with different frequencies.

**Table S1.** The lattice constants of ZIS and Al-ZIS nanosheets.

| Samples | Cell parameters (Å) |           |            | V (Å <sup>3</sup> ) | Rp (%) |
|---------|---------------------|-----------|------------|---------------------|--------|
|         | a                   | b         | c          |                     |        |
| ZIS     | 3.7245533           | 3.7245533 | 26.2388867 | 315.22773           | 7.06   |
| Al-ZIS  | 3.7816752           | 3.7816752 | 30.6091280 | 379.09674           | 7.51   |

**Table S2.** Solar-driven overall water splitting performance of various photocatalysts in reported references.

| Photocatalysts                                                                                 | Activity measurement                      |                                           |                                       | Ref.                 |
|------------------------------------------------------------------------------------------------|-------------------------------------------|-------------------------------------------|---------------------------------------|----------------------|
|                                                                                                | H <sub>2</sub><br>( $\mu\text{mol/g/h}$ ) | O <sub>2</sub><br>( $\mu\text{mol/g/h}$ ) | Illumination                          |                      |
| L-NiCo double hydroxide                                                                        | 34.0                                      | 16.8                                      | 300 W Xe lamp<br>(AM1.5)              | 1                    |
| Ag- ZnIn <sub>2</sub> S <sub>4</sub>                                                           | 56.6                                      | 29.1                                      | 300 W Xe lamp<br>(>420 nm)            | 2                    |
| TiO <sub>2</sub> -ZnIn <sub>2</sub> S <sub>4</sub>                                             | 214.9                                     | 81.7                                      | 300 W Xe lamp<br>(full spectrum)      | 3                    |
| Pt-ZnIn <sub>2</sub> S <sub>4</sub> /rGO/Co <sub>3</sub> O <sub>4</sub> -<br>BiVO <sub>4</sub> | 24.5                                      | 11.9                                      | 300 W Xe lamp<br>(>420 nm)            | 4                    |
| ZIS-WO/C-wood                                                                                  | 169.2                                     | 82.5                                      | 300 W Xe lamp<br>(AM 1.5G)            | 5                    |
| MoS <sub>2</sub> -CdS/WO <sub>3</sub> -MnO <sub>2</sub>                                        | 0.5                                       | 0.26                                      | 300 W Xe lamp<br>(>420 nm)            | 6                    |
| PtS-ZnIn <sub>2</sub> S <sub>4</sub> /WO <sub>3</sub> -MnO <sub>2</sub>                        | 38.8                                      | 15.7                                      | 300 W Xe lamp<br>(>420 nm)            | 7                    |
| Single atom Ni/ Polymeric<br>carbon nitride                                                    | 26.7                                      | 24.0<br>(H <sub>2</sub> O <sub>2</sub> )  | 300 W Xe lamp<br>(>420 nm)            | 8                    |
| CoO atomic layers                                                                              | 4.4                                       | 2.6                                       | 300 W Xe lamp<br>(>420 nm)            | 9                    |
| PtO <sub>x</sub> /WN                                                                           | 0.9                                       | 0.48                                      | 300 W Xe lamp<br>(>420 nm)            | 10                   |
| Cu <sub>2</sub> O                                                                              | 4.0                                       | 2.0                                       | 300 W Xe lamp<br>(>460 nm)            | 11                   |
| <b>Al-ZIS</b>                                                                                  | <b>77.2</b>                               | <b>35.3</b>                               | <b>300 W Xe lamp<br/>(&gt;420 nm)</b> | <b>This<br/>work</b> |

**Table S3.** ICP-OES data for Al-ZIS with different amount of Al doping.

| Samples  | Atomic concentration (ppm) |       |      |
|----------|----------------------------|-------|------|
|          | Zn                         | In    | Al   |
| ZIS      | 8.21                       | 42.38 | 0    |
| Al-ZIS-1 | 7.46                       | 41.03 | 0.27 |
| Al-ZIS-2 | 8.13                       | 42.29 | 0.48 |
| Al-ZIS-3 | 8.60                       | 43.53 | 0.59 |
| Al-ZIS-4 | 8.27                       | 42.51 | 0.77 |
| Al-ZIS-5 | 8.16                       | 41.38 | 1.58 |

**Table S4.** Parameters obtained from time-resolved PL decay curves according to a double-exponential decay.

| Samples | $\tau_1$ (ns) | $\tau_2$ (ns) | $A_1$ (ns) | $A_2$ (ns) | $\tau_{av}$ (ns) |
|---------|---------------|---------------|------------|------------|------------------|
| ZIS     | 0.89          | 6.11          | 54.62      | 45.38      | 5.33             |
| Al-ZIS  | 0.72          | 7.58          | 41.22      | 58.78      | 7.15             |

## References:

1. Wang, M.; Wang, J. Q.; Xi, C. et al. A Hydrogen Deficient Nickel-Cobalt Double Hydroxide for Photocatalytic Overall Water Splitting. *Angew. Chem. Int. Ed.* 2020, 132 (28), 11607-11612.
2. Pan, R.; Hu, M.; Liu, J. et al. Two-Dimensional All-in-One Sulfide Monolayers Driving Photocatalytic Overall Water Splitting, *Nano Lett.* 2021, 21, 6228-6236.
3. Zuo, G.; Wang, Y.; Teo, W. L. et al. Direct Z-scheme  $\text{TiO}_2$ - $\text{ZnIn}_2\text{S}_4$  nanoflowers for cocatalyst-free photocatalytic water splitting, *Appl. Catal. B-Environ.* 2021, 291, 120126.
4. Ou, M.; Li, J.; Geng, M. et al. Construction of Z-scheme Photocatalyst Containing  $\text{ZnIn}_2\text{S}_4$ ,  $\text{Co}_3\text{O}_4$ -Photodeposited  $\text{BiVO}_4$  (110) Facets and rGO Electron Mediator for Overall Water Splitting into  $\text{H}_2$  and  $\text{O}_2$ , *Catal. Lett.* 2021, 151, 2570-2582.
5. Wang, Y.; Huang, W.; Guo, S. et al. Sulfur-Deficient  $\text{ZnIn}_2\text{S}_4$ /Oxygen-Deficient  $\text{WO}_3$  Hybrids with Carbon Layer Bridges as a Novel Photothermal/Photocatalytic Integrated System for Z-Scheme Overall Water Splitting, *Adv. Energy Mater.* 2021, 11, 2102452.
6. Wei, D.; Ding, Y.; Li, Z. Noble-metal-free Z-Scheme  $\text{MoS}_2$ - $\text{CdS}/\text{WO}_3$ - $\text{MnO}_2$  nanocomposites for photocatalytic overall water splitting under visible light, *Int. J. Hydrog. Energy* 2020, 45, 17320-17328.
7. Ding, Y.; Wei, D.; He, R. et al. Rational design of Z-scheme  $\text{PtS}-\text{ZnIn}_2\text{S}_4/\text{WO}_3$ - $\text{MnO}_2$  for overall photocatalytic water splitting under visible light, *Appl. Catal. B-Environ.* 2019, 258, 117948.
8. Li, Y.; Wang, Y.; Dong, C. et al. Single-atom nickel terminating  $\text{sp}^2$  and  $\text{sp}^3$  nitride in polymeric carbon nitride for visible-light photocatalytic overall water splitting, *Chem. Sci.* 2021, 12, 3633-3643.
9. Xu, J.; Li, X.; Ju, Z. et al. Visible-Light-Driven Overall Water Splitting Boosted by Tetrahedrally Coordinated Blende Cobalt (II) Oxide Atomic Layers. *Angew. Chem. Int. Ed.* 2019, 131, 3064-3068.
10. Wang, Y.; Nie, T.; Li, Y. et al. Black Tungsten Nitride as a Metallic Photocatalyst for Overall Water Splitting Operable at up to 765 nm, *Angew. Chem. Int. Ed.* 2017, 56, 7430-7434.
11. Hara, M.; Kondo, T.; Komoda, M. et al.  $\text{Cu}_2\text{O}$  as A Photocatalyst for Overall Water Splitting under Visible Light Irradiation. *Chem. Commun.* 1998, 357-358.
